# Supplementary material for: Functionally graded magnetodielectric composite substrates for massive miniaturization of microstrip antennas
Source: Royal Society of Chemistry journal article supplement (doi:10.1039/d1ma00844g), 2022-01-01
Supplement: d1ma00844g1.pdf [file d1ma00844g1.pdf]

# Functionally Graded Magnetodielectric Composite Substrates for Massive Miniaturization of Microstrip Antennas

Deepa Rajendran Lekshmi<sup>a,b</sup>, Sivan Pillai Adarsh<sup>a,b</sup>, Manikanta Bayal<sup>c</sup>, Swapna S. Nair<sup>c</sup>  
and Kuzhichalil Peethambharan Surendran<sup>a,b\*</sup>

<sup>a</sup>Materials Science and Technology Division, CSIR-National Institute for Interdisciplinary  
Science and Technology, Industrial Estate, Thiruvananthapuram - 695 019, Kerala, India

<sup>b</sup>Academy of Scientific and Innovative Research (AcSIR), Ghaziabad, Uttar Pradesh - 201 002,  
India

<sup>c</sup>Department of Physics, Central University of Kerala, Thejaswini Hills, Periyar, Kasaragod -  
671316, India

\* Corresponding author.

*E-mail:* [kpsurendran@niist.res.in](mailto:kpsurendran@niist.res.in)

Tel.: +91-471-2515474, +91-471-2515258

Fax: +91-471-2491712

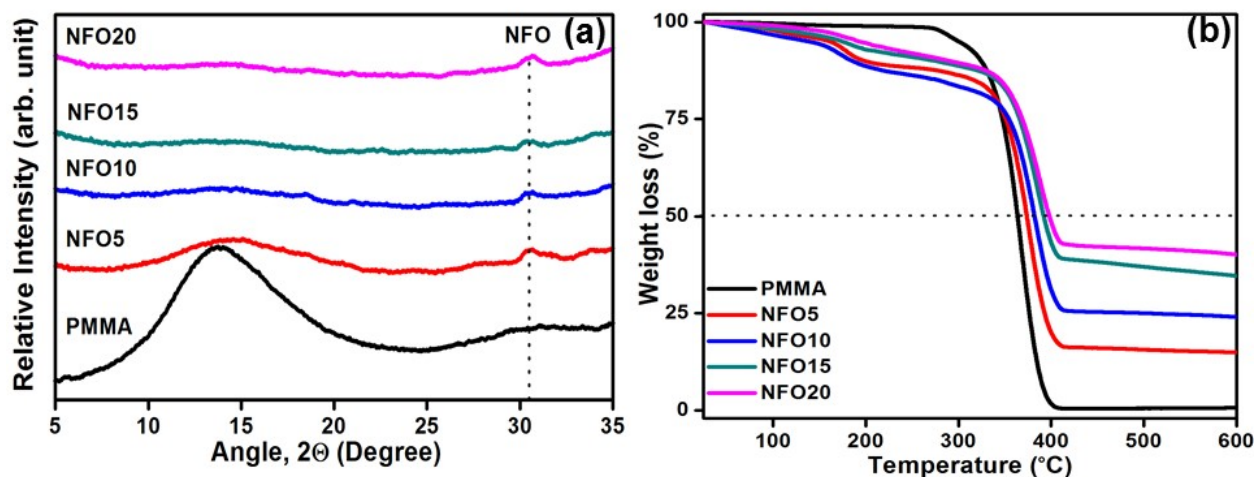

Figure S1: (a) WAXD of pristine PMMA along with the developed composites, (b) TG profile of PMMA and composites.

Table S1: Remanent magnetization ( $M_r$ ) and saturation magnetization ( $M_s$ ) values obtained for different composites developed.

| Composition | $M_r$ (emu/g) | $M_s$ (emu/g) |
|-------------|---------------|---------------|
| NFO5        | 0.5           | 3.9           |
| NFO10       | 0.8           | 4.7           |
| NFO15       | 1.3           | 8.8           |
| NFO20       | 2.7           | 14.1          |
| NFO         | 6             | 48            |

**Table S2: Coefficient of thermal expansion(CTE) values of samples developed.**

| <b>Composition</b> | <b>CTE (ppm/°C)</b> |
|--------------------|---------------------|
| <b>PMMA</b>        | <b>87.3</b>         |
| <b>NFO5</b>        | <b>84.5</b>         |
| <b>NFO10</b>       | <b>72.1</b>         |
| <b>NFO15</b>       | <b>68.1</b>         |
| <b>NFO20</b>       | <b>65.6</b>         |
| <b>NFO</b>         | <b>13.4</b>         |
